1 A survey of vaccine-induced measles IgG antibody titer and the verification of changes

2 in temporal differences of measles vaccination in young adults

3

4 Hiraku Sasaki<sup>1\*</sup>, Tomoko Fukunaga<sup>2</sup>, Ai Asano<sup>2</sup>, Yoshio Suzuki<sup>3</sup>, Yuko Nakanishi<sup>1</sup>,

5 Junzi Kondo<sup>1</sup>, Hiroki Ishikawa<sup>4</sup>, Nobuto Shibata<sup>1,2</sup>

6

7 <sup>1</sup> Department of Health Science, <sup>2</sup> Section of Health Management, and <sup>3</sup> Department of

8 Sports Science, Faculty of Health and Sports Science, Juntendo University, 1-1

9 Hiraga-gakuendai, Inzai, Chiba 270–1695, Japan.

10 <sup>4</sup> Department of Microbiology and Immunology, Showa University School of Medicine,

11 1-5-8 Hatanodai, Tokyo 142–8555, Japan.

12

13 Correspondence: Dr. Hiraku Sasaki, Laboratory of Microbiology and Hygiene,

14 Department of Health Science, Faculty of Health and Sports Science, Juntendo

15 University 1-1 Hiraga-gakuendai, Inzai, Chiba 270-1695, Japan.

16

## 17 **Abstract**

18           In Japan, sporadic measles cases increased rapidly in 2019 compared to that in  
19 past 6 years. To clarify the persistence of immunity against measles in young adult, this  
20 study explored the prevalence of IgG antibody titer against measles virus in 18- to  
21 24-year-old young adult participants. Measles-specific IgG antibody titers determined  
22 by enzyme immunoassay in serum samples collected from 506 participants between 18  
23 to 24 years were assessed through statistical analyses. Multiple regression analysis  
24 revealed that the distribution of measles IgG antibody titers was significantly correlated  
25 with medical history ( $P < 0.05$ ), while there was no significant difference among the  
26 number of vaccinations related to measles IgG titers. Further, measles IgG titers were  
27 significantly different, which was determined by the temporal change that elapsed  
28 period after last vaccination ( $P < 0.05$ ). These results indicate that periodic vaccination  
29 against measles is required for young and older adults to prevent even sporadic measles  
30 infection.

31

32

## 33 **Introduction**

34           In Japan, more than 300 cases of measles were reported, which has increased  
35 rapidly compared to that in the past 6 years [1]. Measles cases were reported in 21 of 47  
36 prefectures, and in particular, a third part of measles case were found in Osaka  
37 prefecture within 1<sup>st</sup> to 10<sup>th</sup> week in 2019 [1]. Taking measles vaccination twice in  
38 lifetime induced acquired immunity against measles in more than 95% of people [2, 3].  
39 For the measles vaccination program in Japan, a person born after April 2006 is defined  
40 to have received 2 doses of measles vaccine as a periodic inoculation at 1-2 year and 5-7  
41 years of age [4]. Before the Application of these regulations, there used to be only  
42 primary vaccination after 12 months of age. Thereafter, there was a change in the  
43 regulations of the Ministry of Health, Labor and Welfare recommending 2 doses of  
44 measles vaccination for people born before April 2006 with secondary inoculation being  
45 received within the duration of 5 years (2008–2012, equivalent to 13 and 18 years of  
46 age) as special measures for periodic inoculation [4]. Within the 5 -years, the rate of  
47 vaccination ranged from 77.3 to 94.3% [5]; however, recent vaccination rate exhibited  
48 more than 90% of people receiving measles vaccines twice in Japan [6]. Except for the

49 people who received secondary vaccination at limited periods, almost all young adults  
50 born after April 2006 were vaccinated twice before they were 7 years of age. A large  
51 measles outbreak is thought to be physically impossible in later childhood due to the  
52 implementation of the measles vaccine program; however, there was insufficient  
53 knowledge about the existence of protective antibody titer against measles in young  
54 adults who received secondary measles vaccine within the 5 years duration limit.  
55 Currently, measles cases are based on age bracket. In brief, more than 50% of measles  
56 cases were seen in 15–29-year-old individuals, while less than 10–14-year-old  
57 constituted only 12% [1]. Almost all young adults around 20 years of age were  
58 subjected to the special measures of periodic inoculation but all of them did not receive  
59 the same manner of measles vaccination. In particular, temporal changes in protective  
60 serum IgG antibody against measles virus may vary in spite of receiving secondary  
61 vaccination lately compared to young adults. However, temporal changes in measles  
62 IgG antibody titer in generation of young adults that was subjected to special measures  
63 of measles vaccine are obscure. Thus, there is a need to elucidate the factors involved in  
64 the risk of the infection as well as the ways of reducing the occurrence of the infection.

65           To clarify the persistence of immunity against measles in young adults, this  
66 study explored the prevalence of IgG antibody titer against measles virus in  
67 18–24-year-old young adult participants, and determined the relationships between  
68 temporal changes in the antibody.

69

## 70 **Materials and Methods**

### 71 **Study design**

72           The surveillance was carried out by obtaining samples of sera from 506 young  
73 adults between 18 to 24 years of age, who were first-year students in Juntendo  
74 University to assess the prevalence of specific IgG antibodies against measles virus. The  
75 serum samples were obtained from January 2018 to April 2018. Simultaneously, vaccine  
76 history was collected from each individual's maternity passbook. The studied  
77 participants also filled out questionnaires aimed at obtaining information about the  
78 medical history of vaccination against measles and natural measles infection. The  
79 collected information was used for proper interpretation of the obtained results.

80           The study protocol was approved by the Ethics Committee of Faculty of Health

81 and Sports Science, Juntendo University (number 30-2) and informed consent was

82 obtained from all participants and their parents before the study.

83

## 84 **Laboratory methods**

85 To determine measles-specific serum IgG antibody titer, the enzyme

86 immunoassay (EIA) was performed in the laboratory of BML, INC. (Tokyo, Japan)

87 using a measles virus immunoglobulin test kit (the Measles IgG-EIA manufactured by

88 Denka Seiken., Co., Ltd, Tokyo, Japan). For the virus antigen, Toyoshima strain was

89 used.

90

## 91 **Statistical analysis**

92 To identify the factors that influence measles-specific IgG antibody titer, multiple

93 regression analysis was performed. To avoid multicollinearity, factors were preliminary

94 determined with bivariate analysis and were confirmed to have no correlation.

95 Differences in the IgG antibody titers between the participants that had a medical

96 history of measles and those without history were evaluated with the unpaired *t*-tests. To

97 compare differences in IgG antibody titers among the numbers of vaccination and  
98 temporal characteristics, a one-way analysis of variance (one-way ANOVA) was  
99 employed. When there were significant statistical differences, the data were further  
100 analyzed using the Bonferroni *post hoc* test to determine the significance between the  
101 groups. Differences were considered significant for *P* values of less than 0.05.

102

## 103 **Results**

### 104 **Outline of survey participants**

105       During the blood collection for determining antibody titers in this surveillance,  
106 participants who were 18 years of age were 80% of total survey participants while the  
107 remaining 20% of participants were  $\geq 19$  years old. All the subjects who were 19 years  
108 old did not receive secondary inoculations. Approximately 80% of the participants  
109 received secondary vaccination, and 10% received only primary vaccination (Table 1).  
110 Approximately 4% of participants had a medical history of measles based on  
111 self-assessment information.

112

113 Table 1 Outline of measles-vaccine induced antibody survey participants

| Characteristic  | Number | Percentage |
|-----------------|--------|------------|
| Total           | 506    | 100        |
| Age, Y          |        |            |
| Mean            | 18     |            |
| Range           | 17-24  |            |
| Sex             |        |            |
| Female          | 160    | 32         |
| Male            | 346    | 68         |
| Vaccination     |        |            |
| 1               | 56     | 11         |
| 2               | 399    | 79         |
| 3               | 21     | 4          |
| Unvaccinated    | 30     | 6          |
| Medical history | 22     | 4          |

124

## 125 **Measles-IgG titer and temporal characterization**

126 The mean value of measles-specific IgG antibody titer determined by EIA

127 exhibited  $13.4 \pm 12.0$  (Mean  $\pm$  standard deviation) ranging from 0.8 to 128 (Table 2).

128 The period of the month when primary and secondary vaccines were received exhibited



129 23.6±32.5 and 152.2 ±25.4 month, respectively. The recommended age for primary  
130 measles vaccination was to be from 12 to 90 months during 1995 to 2000, and therefore,  
131 the duration for primary vaccination was extended. Almost all participants corresponded  
132 to the special measure that was recommended for secondary vaccination at 13 years of  
133 age during 2008 to 2013, indicating that more than 80% of participants received  
134 secondary vaccination at the assigned period. Regarding all the vaccinated participants,  
135 an average of 7 years passed from last vaccination.

136

137 Table 2 Measles-specific IgG antibody titer and temporal characteristics of participants.

| Item                                  | Mean  | Range     | Number                    |
|---------------------------------------|-------|-----------|---------------------------|
| Measles-specific IgG titer            | 13.4  | 0.8 - 128 | 506 <sup>138</sup><br>139 |
| 1st vaccination months                | 23.6  | 11- 263   | 476                       |
| 2nd vaccination months                | 152.2 | 16 - 265  | 420 <sup>140</sup>        |
| 3rd vaccination months                | 156.0 | 53 - 238  | 21<br>141                 |
| Elapsed months after last vaccination | 83.3  | 0 - 237   | 476                       |

142

143

144

## 145 **Divergence of measles-IgG antibody titers by medical history**

146 To discern mode of measles IgG antibody titer's distribution, multiple regression  
147 analysis was performed for the IgG antibody titers and temporal characteristics. It was  
148 observed that almost all parameters related to temporal characteristics had  
149 multicollinearity. Thus, multiple regression analysis was performed based on Table 1  
150 listed items devoid of temporal information. Of these, the distribution of measles IgG  
151 antibody titers was significantly correlated with medical history of measles ( $P < 0.05$ ).  
152 Then, the differences in measles IgG antibody titers between presence and absence of  
153 medical history were compared by the unpaired  $t$ -tests (Figure 1). The IgG antibody  
154 titers collected from participants who had medical history of measles ( $27.0 \pm 31.8$ ) were  
155 significantly higher than titers from participants who had no history ( $12.8 \pm 9.9$ ,  $P <$   
156  $0.05$ ).

157 Figure 2 shows measles IgG antibody titers that were divided into each numbers  
158 of measles vaccinated and unvaccinated participants. The measles IgG antibody titers  
159 from the participants who had a medical history of measles were excluded from Figure  
160 2 and statistical analysis since almost all participants who had a medical history had

161 been unvaccinated and exhibited higher IgG antibody titer than participants who had no  
162 history. The results of one-way ANOVA showed that there was no significant difference  
163 among the number of vaccinations.

164

### 165 **Temporal changes in measles-IgG antibody titers**

166 To verify the temporal changes in measles IgG antibody titers after the last  
167 vaccination, the elapsed periods were divided into 5 periods including 3 month or less  
168 (n = 9), 4–12 months (n = 8), 13–60 months (n = 31), 61–72 months (n = 279), and 73  
169 months or more (n = 73). In measles vaccine program, almost all participants received  
170 secondary vaccination at 13 years of age, and thus, approximately 70% of participants  
171 were observed in the period 61–72 months. Excluding measles IgG antibody titers from  
172 the participants who had a medical history and those who were unvaccinated, one-way  
173 ANOVA showed that there were significant differences among the 5-periods (Figure 3,  
174  $P < 0.05$ ). Although secondary period (4-12 month) contained a few dispersed measles  
175 IgG antibody titer values, the mean values of measles IgG antibody titer decreased with  
176 the prolonged period. The Bonferroni *post hoc* test showed that there were 4 significant

177 differences between each period ( $P < 0.05$ ), indicating that measles IgG antibody titer  
178 retains high value if elapsed period is short after last vaccination.

179

## 180 **Discussion**

181 To protect from measles virus infection, measles-specific serum IgG antibody  
182 titer determined by the EIA method was required 12 or more, and in case of unsatisfied  
183 titer, additional vaccination was recommended [7]. Although average measles IgG  
184 antibody titer of total participants slightly exceeded 12, 56% of measles IgG antibody  
185 titers from 284 participants showed less than 12. These results indicate that more than  
186 half of the studied participants required additional dose to protect against measles.  
187 According to WHO announcement, Japan was verified as having achieved measles  
188 elimination that was defined as interruption of endemic measles virus transmission for  
189 at least 36 months [8]. Nevertheless, measles cases from foreigners in Japan have  
190 occurred sporadically [1, 9-12]. Based on our surveillance, one of the causes may be  
191 non-persistent protection by measles IgG antibody titer in young adults. When measles  
192 was endemic in Japan, approximately 200,000 people, mainly children, were infected

193 with measles virus in the year 2000 [13, 14]. Thereafter, an attempt to raise coverage of  
194 measles vaccination and to enforce 2 doses vaccination rigorously was successfully  
195 achieved, which led to the elimination-period [8]. Currently, protection against measles  
196 infection has been achieved; “however, the generation with insufficient immunization  
197 against measles virus is mainly the young adults suggesting that periodic monitoring of  
198 measles epidemic and acquired immunity against measles virus in young adult is  
199 required.

200 Further, this surveillance focused on the temporal status of measles IgG antibody  
201 from last vaccination, although there was no significant difference in measles IgG  
202 antibody titers after primary and secondary vaccination. In the United States,  
203 vaccination schedule and patterns are similar to those in Japan, and measles was  
204 declared eliminated with the absence of continuous measles transmission for a period  
205 greater than 12 months in the United States in the year 2000 [15]. However, endemic  
206 outbreaks of measles were reported to be yet to occur [16-18], and in rarity, a part of  
207 those outbreaks was caused by unvaccinated population [19]. For primary vaccine  
208 failure, CD46 and TLR8 variants were considered involved in the occurrence of measles

209 vaccine failure [20]. Although it will be possible to have such cases, epidemiological  
210 studies have demonstrated the efficacy of measles vaccine. In brief, 95% of children  
211 who received measles vaccine acquired immunity against measles virus, and further,  
212 additional secondary vaccine led to more than 99% immunization in children [21-23].  
213 These results revealed that epidemic outbreaks might be caused by the unvaccinated  
214 population or large number of international travelers [3]. Further, according to the large  
215 surveillance by healthcare workers, serum measles IgG antibody titers from adults less  
216 than 29 years of age showed susceptibility to measles [24]. Single dose of measles  
217 vaccine in adults was reported to have significantly increased serum IgG titers even in  
218 the initial insufficient IgG titers [25]. Sporadic infection may occur in young and older  
219 adults under unprotected conditions and with reduced vaccine-induced IgG antibody  
220 titer due to the temporal changes after last vaccination and consequent susceptibility to  
221 infection. These results also suggest that preventive vaccination against measles is  
222 required for young and older adults to prevent even sporadic measles cases.

223

## 224 **Acknowledgements**

225 This work was partially supported by JSPS KAKENHI Grant Number 16K07095.

226

## 227 **References**

228 [1] National Institute of Infectious Disease, Infectious Disease Surveillance Center.

229 Infectious diseases weekly report Japan 2019;21:10.

230 <https://www.niid.go.jp/niid/ja/idwr-dl/2019.html>.

231 [2] Demicheli V, Rivetti A, Debalini MG, Di Pietrantonj C. Vaccines for measles,

232 mumps and rubella in children. *Cochrane Database Syst Rev* 2012;(2):CD004407.

233 [3] Moss WJ, Griffin DE. Measles. *Lancet* 2012;379(9811):153–64.

234 [4] Ministry of Health, Labor and Welfare. Measles,

235 [https://www.mhlw.go.jp/seisakunitsuite/bunya/kenkou\\_iryuu/kenkou/kekkaku-kans](https://www.mhlw.go.jp/seisakunitsuite/bunya/kenkou_iryuu/kenkou/kekkaku-kans)

236 [enshou/measles\\_eng/index.html](https://www.mhlw.go.jp/seisakunitsuite/bunya/kenkou_iryuu/kenkou/kekkaku-kansenshou/measles_eng/index.html).

237 [5] Tanaka-Taya K. Progress towards the 2012 measles elimination goal in Japan.

238 *Uirusu* 2010;60(1):59–68.

239 [6] Ministry of Health, Labor and Welfare.

240 <https://www.mhlw.go.jp/bunya/kenkou/kekkaku-kansenshou21/hashika.html>.

- 241 [7] Takayama N, Saika S, Ichinohe S. EIA-IgG antibody measles prevention level  
242 estimated from measles neutralizing, particle agglutination and  
243 hemagglutination-inhibition antibody titer. *Kansenshogaku Zasshi*  
244 2009;83(5):519–24.
- 245 [8] World Health Organization. Disease outbreak news. Emergencies preparedness,  
246 response. Measles – Japan,  
247 <https://www.who.int/csr/don/20-june-2018-measles-japan/en/>;2018.
- 248 [9] Komabayashi K, Seto J, Tanaka S, Suzuki Y, Ikeda T, Onuki N, Yamada K, Ahiko T,  
249 Ishikawa H, Mizuta K. The largest measles outbreak, including 38 modified  
250 measles and 22 typical measles cases in its elimination era in Yamagata, Japan in  
251 2017. *Jpn J Infect Dis* 2018;71(6):413–8. doi: 10.7883/yoken.JJID.2018.083.
- 252 [10] Miyoshi M, Komagome R, Yamaguchi H, Ohnishi A, Kikuchi M, Ishida S, Nagano  
253 H, Okano M. Detection of measles virus genotypes B3, D4, D5, D8, and H1 in the  
254 surveillance system in Hokkaido, Japan, 2006-2015, the last decade toward the  
255 elimination. *Jpn J Infect Dis* 2017;70(3):317–9. doi: 10.7883/yoken.JJID.2016.253.
- 256 [11] Nishiura H, Mizumoto K, Asai Y. Assessing the transmission dynamics of measles



257 in Japan in 2016. *Epidemics* 2017;20:67–72. doi: 10.1016/j.epidem.2017.03.005.

258 [12] Shimizu K, Kinoshita R, Yoshii K, Akhmetzhanov AR, Jung S, Lee H, Nishiura H.

259 An investigation of a measles outbreak in Japan and China, Taiwan, China,

260 March-May 2018. *Western Pac Surveill Response J* 2018;9(3):25–31. doi:

261 10.5365/wpsar.2018.9.2.005.

262 [13] Nakatani H, Sano T, Iuchi T. Development of vaccination policy in Japan: current

263 issues and policy directions. *Jpn J Infect Dis* 2002;55(4):101–11.

264 [14] Gomi H, Takahashi H. Why is measles still endemic in Japan? *Lancet*.

265 2004;364(9431):328–9.

266 [15] Papania MJ, Wallace GS, Rota PA, Icenogle JP, Fiebelkorn AP, Armstrong GL,

267 Reef SE, Redd SB, Abernathy ES, Barskey AE, Hao L, McLean HQ, Rota JS,

268 Bellini WJ, Seward JF. Elimination of endemic measles, rubella, and congenital

269 rubella syndrome from the Western hemisphere: the US experience. *JAMA Pediatr*

270 2014;168(2):148–55.

271 [16] Fiebelkorn AP, Redd SB, Gastañaduy PA, Clemmons N, Rota PA, Rota JS, Bellini

272 WJ, Wallace GS. A comparison of postelimination measles epidemiology in the

- 273 United States, 2009-2014 versus 2001-2008. *J Pediatric Infect Dis Soc*
- 274 2017;6(1):40–8.
- 275 [17] Ehresmann K, Banerjee E, Kenyon C, Christianson B, Griffith J, Heath J, Roddy M.
- 276 MDH IDEPC Measles Outbreak Team. Response to "It could have been much
- 277 worse: The Minnesota measles outbreak of 2017". *Vaccine* 2019;37(5):683–4. doi:
- 278 10.1016/j.vaccine.2018.11.031.
- 279 [18] Clemmons NS, Wallace GS, Patel M, Gastañaduy PA. Incidence of measles in the
- 280 United States, 2001-2015. *JAMA* 2017;318(13):1279–81. doi:
- 281 10.1001/jama.2017.9984.
- 282 [19] Nelson R. US measles outbreak concentrated among unvaccinated children. *Lancet*
- 283 *Infect Dis* 2019;19(3):248. doi: 10.1016/S1473-3099(19)30074-X.
- 284 [20] Clifford HD, Hayden CM, Khoo SK, Naniche D, Mandomando IM, Zhang G,
- 285 Richmond P, Le Souëf PN. Polymorphisms in key innate immune genes and their
- 286 effects on measles vaccine responses and vaccine failure in children from
- 287 Mozambique. *Vaccine* 2012;30(43):6180–5. doi: 10.1016/j.vaccine.2012.07.063.
- 288 [21] Moss WJ, Strebel P. Biological feasibility of measles eradication. *J Infect Dis*

- 289 2011;204 Suppl 1:S47–53. doi: 10.1093/infdis/jir065.
- 290 [22]Meissner HC, Strebel PM, Orenstein WA. Measles vaccines and the potential for  
291 worldwide eradication of measles. *Pediatrics* 2004;114(4):1065–9.
- 292 [23]Moss WJ, Griffin DE. Measles. *Lancet*. 2012;379(9811):153–64. doi:  
293 10.1016/S0140-6736(10)62352-5.
- 294 [24]Kumakura S, Shibata H, Onoda K, Nishimura N, Matsuda C, Hirose M.  
295 Seroprevalence survey on measles, mumps, rubella and varicella antibodies in  
296 healthcare workers in Japan: sex, age, occupational-related differences and vaccine  
297 efficacy. *Epidemiol Infect* 2014;142(1):12–9.
- 298 [25]Ogawa T, Uchiyama-Nakamura F, Sugata-Tsubaki A, Yamada Y, Uno K, Kasahara  
299 K, Maeda K, Konishi M, Mikasa K. Antibody response to live attenuated vaccines  
300 in adults in Japan. *Open Med (Wars)* 2016;11(1):482–8. doi:  
301 10.1515/med-2016-0085.

302

### 303 **Figure legends**

304 Figure 1. Comparison of measles-specific IgG antibody titers based on the medical

305 history of participants.

306 The plots of IgG antibody titer that were more than 60 were omitted from Figure 1. The  
307 whiskers extended to data points that were less than 1.5 x IQR away from 1st/3rd  
308 quartile.

309

310 Figure 2. Comparison of measles-specific IgG antibody titers between the number of  
311 vaccinated and unvaccinated participants.

312 The plots of IgG titer that were more than 60 were omitted from Figure 2. The measles  
313 IgG antibody titers from the participants who had a medical history were excluded from  
314 Figure 2 and statistical analysis. The whiskers extended to data points that were less  
315 than 1.5 x IQR away from 1st/3rd quartile. There were no significant differences  
316 between number of vaccinated and unvaccinated participants based on one-way  
317 ANOVA ( $P \geq 0.05$ ).

318

319 Figure 3. Comparison of measles-specific IgG antibody titer among 5-periods of  
320 elapsed months after last vaccination

321 The plots of IgG titer that were more than 60 were omitted from Figure 3. The measles  
322 IgG antibody titers of both the participants who had a medical history and the  
323 unvaccinated participants were excluded from Figure 3 and statistical analysis. The  
324 whiskers extended to data points that were less than 1.5 x IQR away from 1st/3rd  
325 quartile. One-way ANOVA showed that there were significant differences among the  
326 5-periods ( $P < 0.05$ ). An asterisk denotes a significant difference between periods with  
327 connected line ( $P < 0.05$ ).

328

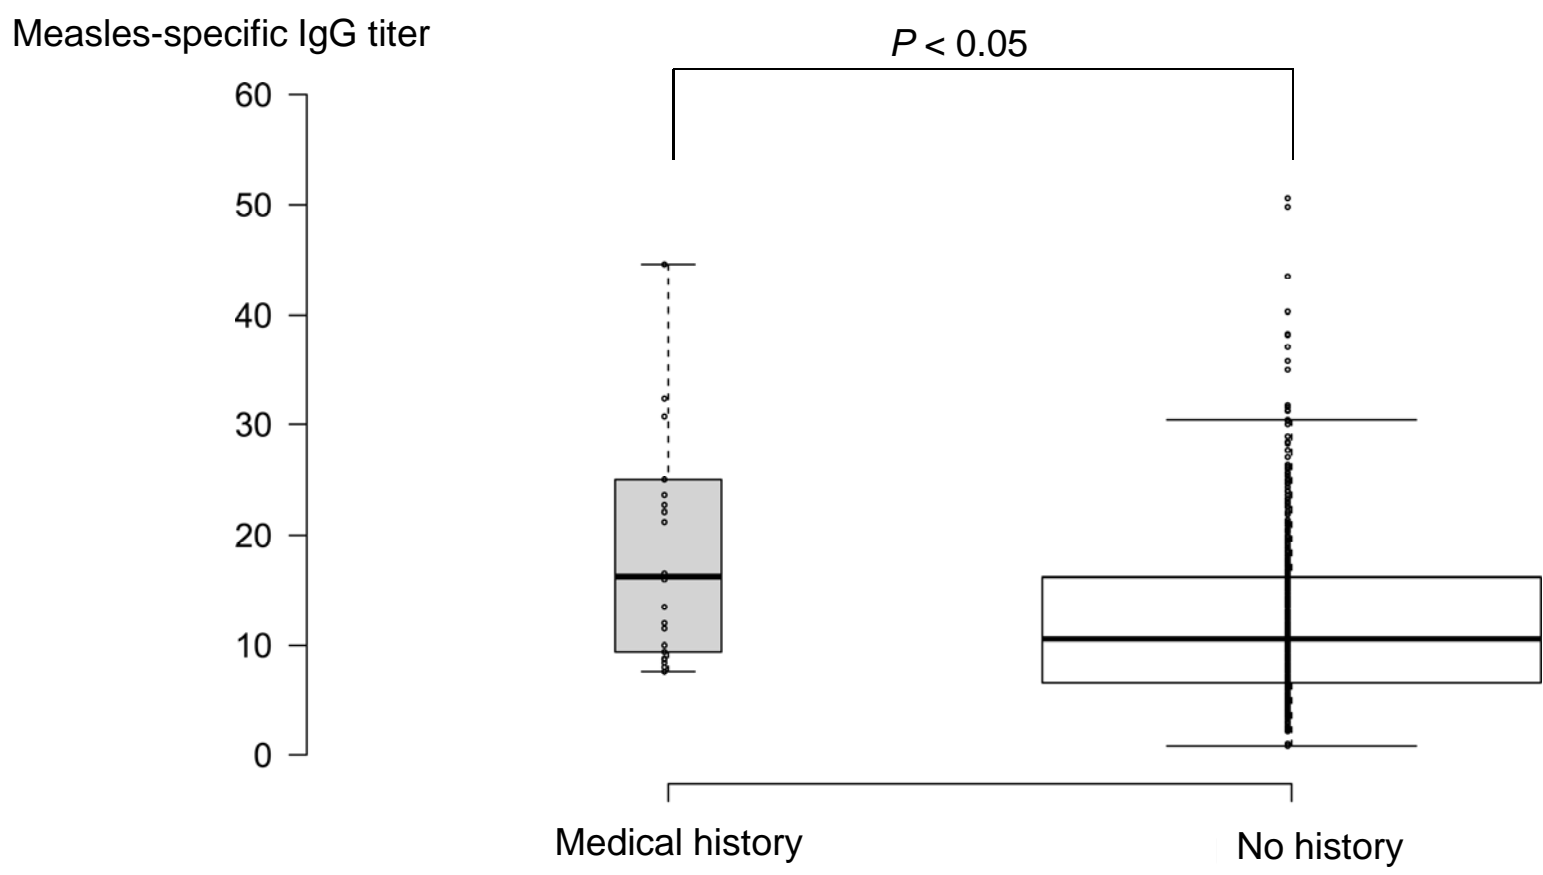

Figure 1

## Measles-specific IgG titer

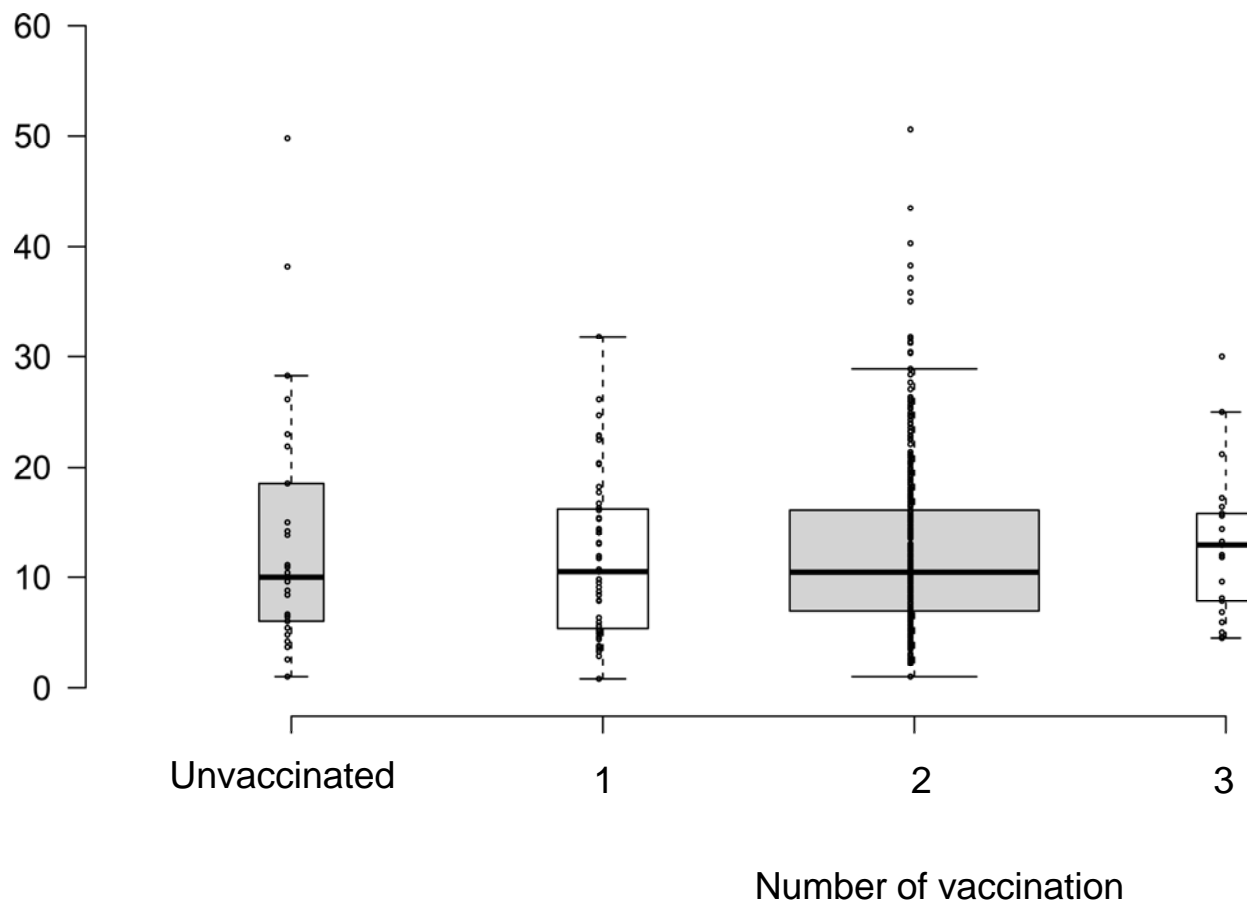

Figure 2

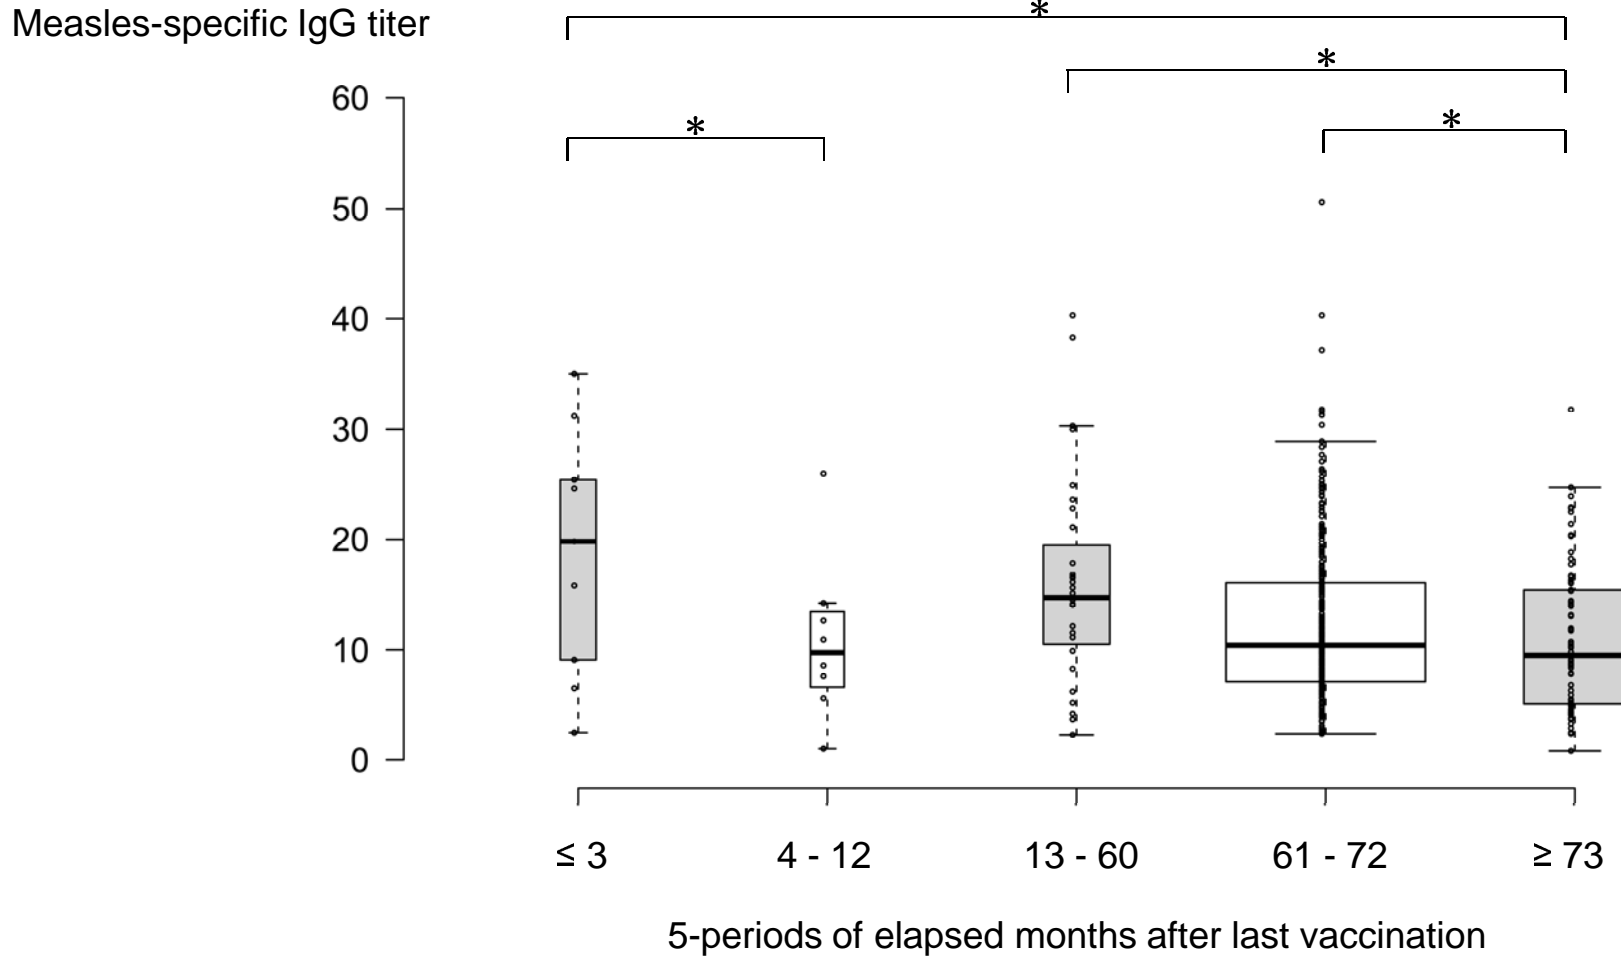

Figure 3
